# Supplementary material
Source: publisher site journal article supplement (https://www.dovepress.com/article/604929)
Supplement: Supplementary file 1 [file supplementary%20files.pdf]

## Supplementary materials

### Supplementary Equation 1

**US\_rad\_score=**

$$-6.3118 - 0.9966 \times F1 + 0.1545 \times F2 + 2.1352 \times F3 + 0.0089 \times F4 + 2.5288 \times F5$$

where the selected radiomic features ( $F1$  to  $F5$ ) are defined as follows:

- $F1$ : Maximum Probability from GLCM (LoG filter,  $\sigma = 2.0$  mm, 3D)
- $F2$ : Autocorrelation from GLCM (original image)
- $F3$ : Elongation (2D shape)
- $F4$ : Minor Axis Length (2D shape)
- $F5$ : Dependence Entropy from GLDM (LoG filter,  $\sigma = 3.0$  mm, 3D)

*Note: GLCM = Gray Level Co-occurrence Matrix; GLDM = Gray Level Dependence Matrix.*

*Filter parameters ( $\sigma$  values) are in mm.*

### Supplementary Equation 2

**MRI\_rad\_score =**  $-0.1630 + 0.0002 \times F1 - 0.0001 \times F2 - 0.3282 \times F3$

where the selected radiomic features ( $F1$  to  $F3$ ) are defined as follows:

- $F1$ : Energy from first-order statistics (LoG filter,  $\sigma = 2$  mm, 3D)
- $F2$ : Coarseness from NGTDM (original image)
- $F3$ : Gray-Level Non-Uniformity Normalized from GLSZM (original image)

*Note: NGTDM = Neighbouring Gray Tone Difference Matrix; GLSZM = Gray-level Size Zone*

*Matrix. Filter parameters ( $\sigma$  values) are in mm.*

## Supplementary figures and figure captions

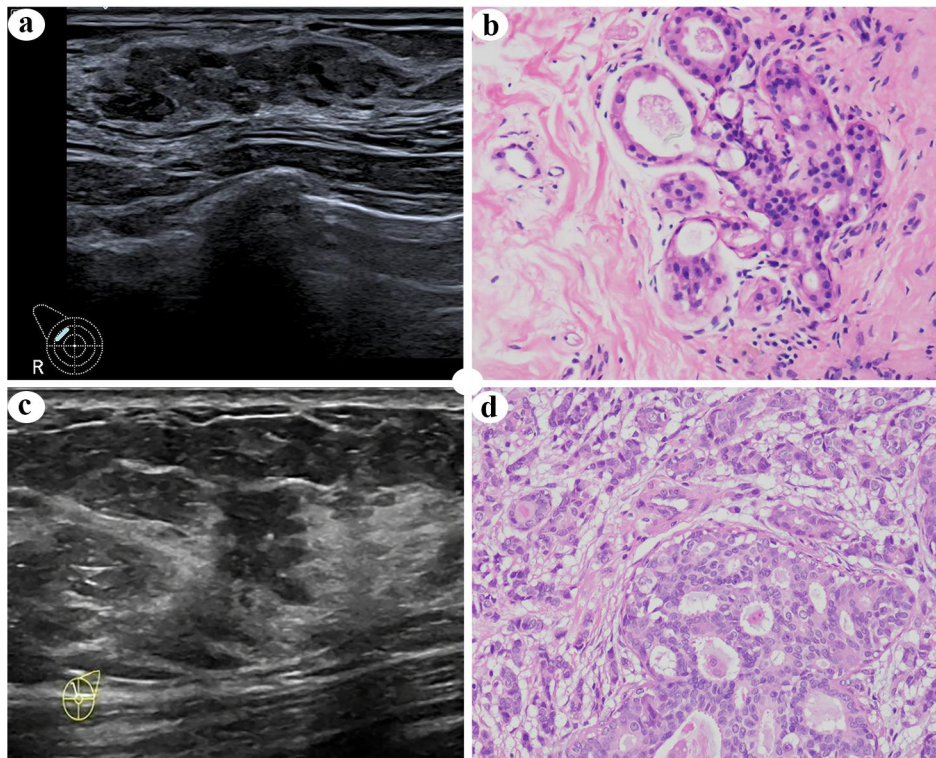

**Supplementary Figure S1** Representative ultrasound BI-RADS features of adenosis and carcinoma. (a, b) Ultrasound image of a 38-year-old woman shows an oval mass with a circumscribed margin and scarce vascularity (body mark in the lower left corner). The lesion was surgically resected and confirmed to be adenosis. (c, d) Ultrasound image of a 47-year-old woman shows an irregular mass with an ill-defined margin, un-parallel orientation, microcalcifications, and internal vascularity (body mark in the lower left corner). The mass was surgically removed and diagnosed as invasive carcinoma. BI-RADS, Breast Imaging Reporting and Data System.

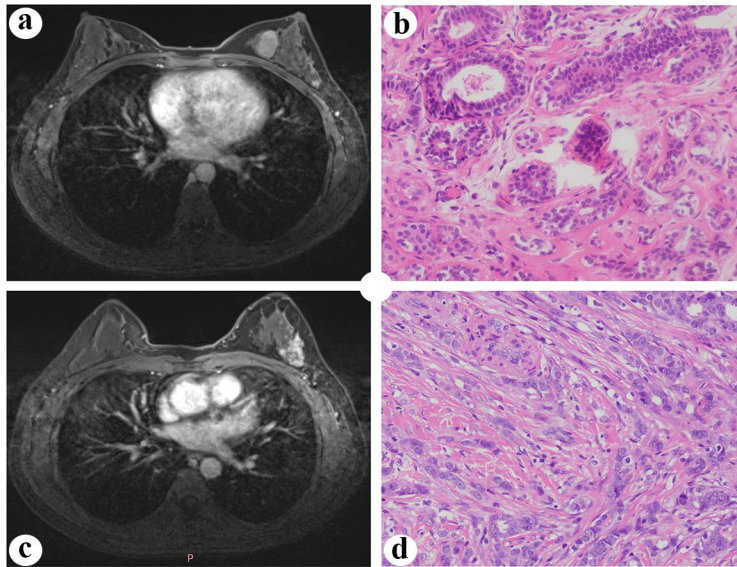

**Supplementary Figure S2** Representative MRI BI-RADS features of adenosis and carcinoma. (a, b) Contrast-enhanced MR image of a 23-year-old woman shows a round mass with mild homogeneous enhancement and circumscribed margins. The lesion was assessed as BI-RADS 4a on MRI but was pathologically diagnosed as fibroadenosis. (c, d) Axial contrast-enhanced MR image of a 46-year-old woman shows an irregular mass with heterogeneous enhancement and spiculated margins. The mass was surgically confirmed to be invasive carcinoma.

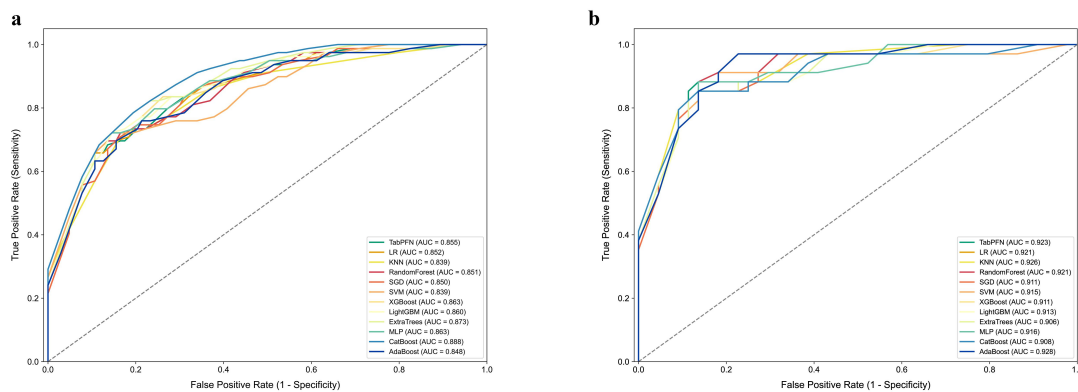

**Supplementary Figure S3** Comparison of classifier algorithms for the BI-RADS model. Area under the the receiver operating characteristic curve (AUC) values for the model implemented with different classifiers are presented for the (a) training and (b) testing cohorts.

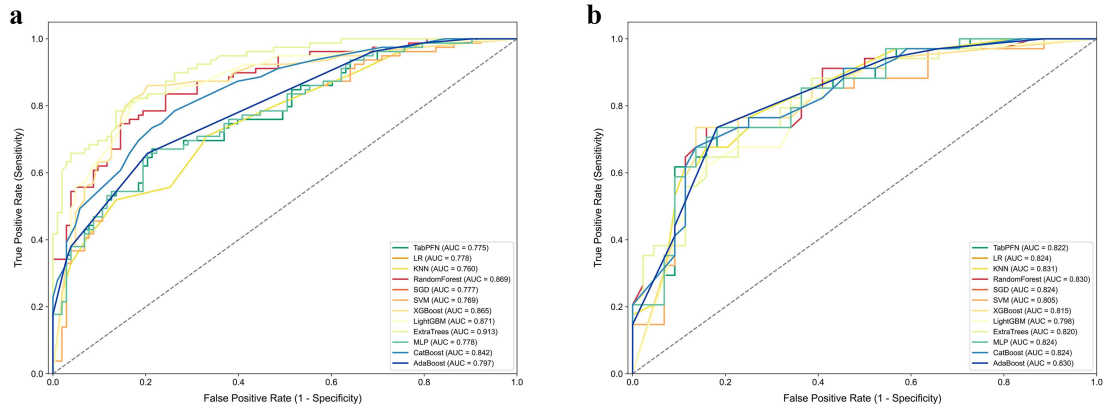

**Supplementary Figure S4** Comparison of classifier algorithms for the US\_Rad model. Area under the the receiver operating characteristic curve (AUC) values for the model implemented with different classifiers are presented for the (a) training and (b) testing cohorts.

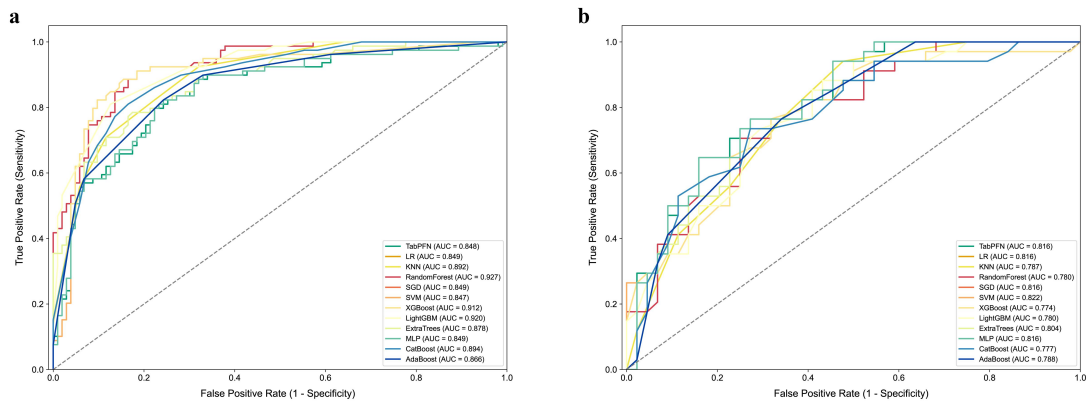

**Supplementary Figure S5** Comparison of classifier algorithms for the MRI\_Rad model. Area under the the receiver operating characteristic curve (AUC) values for the model implemented with different classifiers are presented for the (a) training and (b) testing cohorts.

## Supplementary table

Table 1. Definition of features used in radiomics signatures

| Variable | Full Feature Name                    | Feature Class | Image Type   | Filter ( $\sigma$ ) | Dimension |
|----------|--------------------------------------|---------------|--------------|---------------------|-----------|
|          | Maximum Probability                  | GLCM          | LoG-filtered | 2.0 mm              | 3D        |
|          | Autocorrelation                      | GLCM          | Original     | —                   | 2D/3D     |
|          | Elongation                           | Shape (2D)    | Original     | —                   | 2D        |
|          | Minor Axis Length                    | Shape (2D)    | Original     | —                   | 2D        |
|          | Dependence Entropy                   | GLDM          | LoG-filtered | 3.0 mm              | 3D        |
|          | Energy                               | First-order   | LoG-filtered | 2.0 mm              | 3D        |
|          | Coarseness                           | NGTDM         | Original     | —                   | 3D        |
|          | Gray-Level Non-Uniformity Normalized | GLSZM         | Original     | —                   | 3D        |
